# Supplementary material for: Degradable and Non-Degradable Chondroitin Sulfate Particles with the Controlled Antibiotic Release for Bacterial Infections
Source: MDPI journal article supplement (doi:10.3390/pharmaceutics14081739), 2022-08-20
Supplement: s1 [file s1]

# Degradable and Non-Degradable Chondroitin Sulfate Particles with the Controlled Antibiotic Release for Bacterial Infections

Selin S. Suner <sup>1</sup>, Mehtap Sahiner <sup>2</sup>, Ramesh S. Ayyala <sup>3</sup> and Nurettin Sahiner <sup>1,3,4,\*</sup>

<sup>1</sup> Department of Chemistry & Nanoscience and Technology Research and Application Center, Canakkale Onsekiz Mart University Terzioğlu Campus, Canakkale 17100, Turkey

<sup>2</sup> Bioengineering Department, Engineering Faculty, Canakkale Onsekiz Mart University Terzioğlu Campus, Canakkale 17100, Turkey

<sup>3</sup> Department of Ophthalmology, Morsani College of Medicine, University of South Florida, Tampa, FL 33612, USA

<sup>4</sup> Department of Chemical and Biomolecular Engineering, University of South Florida, Tampa, FL 33620, USA

\* Correspondence: [sahiner71@gmail.com](mailto:sahiner71@gmail.com) or [nsahiner@usf.edu](mailto:nsahiner@usf.edu)

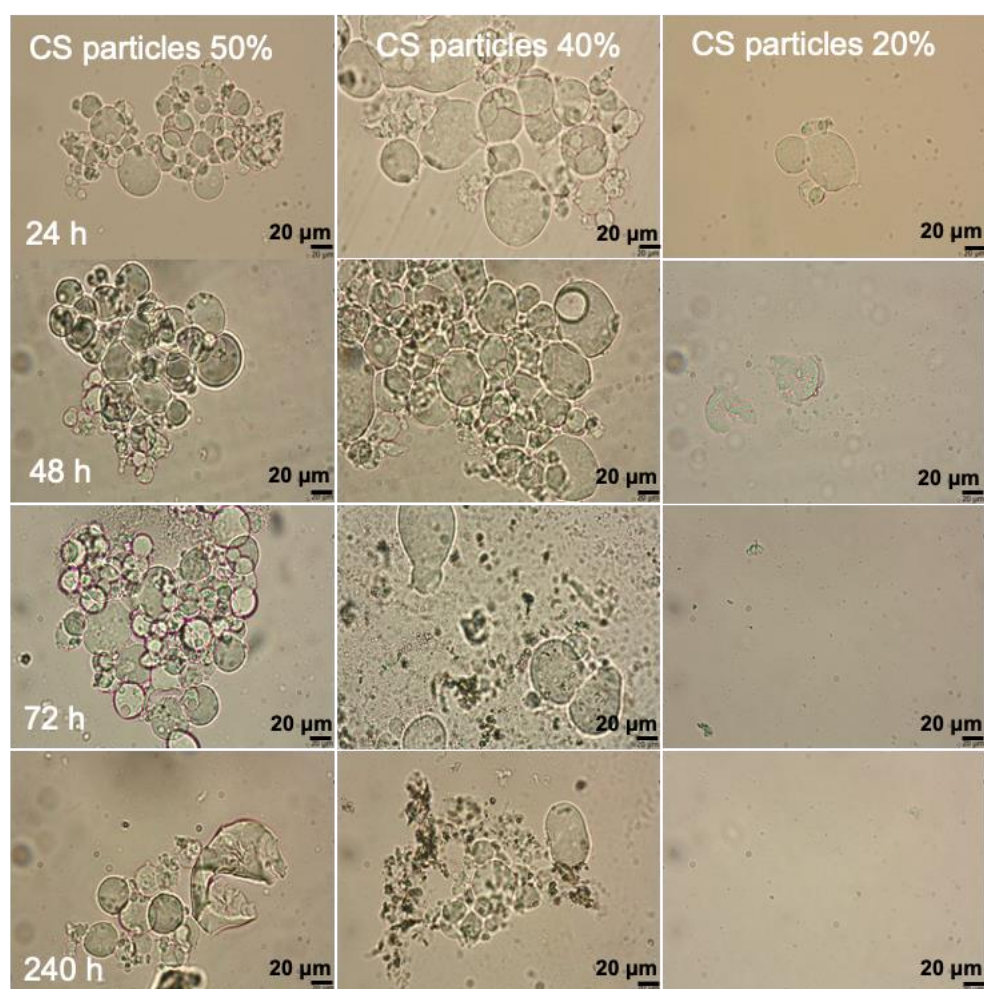

**Figure S1.** Optical microscope images of CS particles crosslinked at 50, 40, and 20% mole ratio of CS repeating unit incubated for 24 h, 48 h, 72 h, and 240 h in physiological conditions at pH 7.4 and 37 °C.

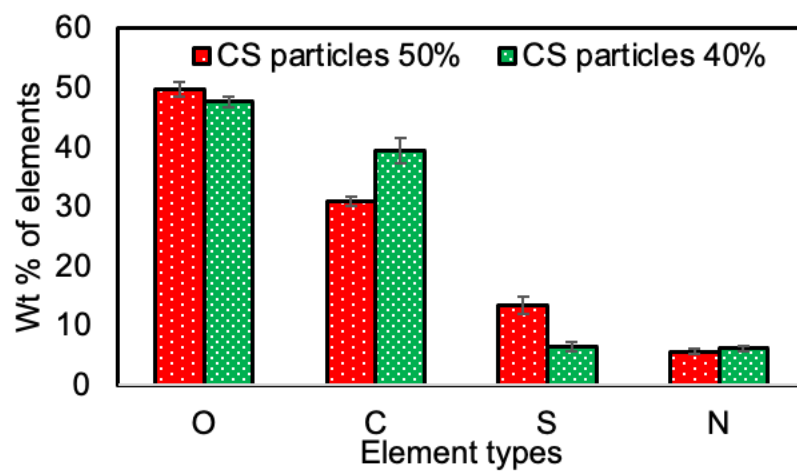

**Figure S2.** Elemental analysis of the CS particles crosslinked at 50%, and 40%.
